# Supplementary material
Source: MDPI journal article supplement (https://www.mdpi.com/2073-4468/12/4/71)
Supplement: s1 [file s1]

## Evaluation of two chemoenzymatic glycan remodeling approaches to generate site-specific antibody-drug conjugates

Qiang Yang<sup>a\*</sup>, He Chen<sup>a</sup>, Chong Ou<sup>b</sup>, Zhihao Zheng<sup>a</sup>, Xiao Zhang<sup>b</sup>, Yunpeng Liu<sup>c</sup>, Guanghui Zong<sup>b</sup>, Lai-Xi Wang<sup>b\*</sup>

<sup>a</sup> GlycoT Therapeutics, College Park, MD 20742; <sup>b</sup> Department of Chemistry and Biochemistry, University of Maryland, College Park, MD 20742; <sup>c</sup> ChemBind LLC, Atlanta, GA

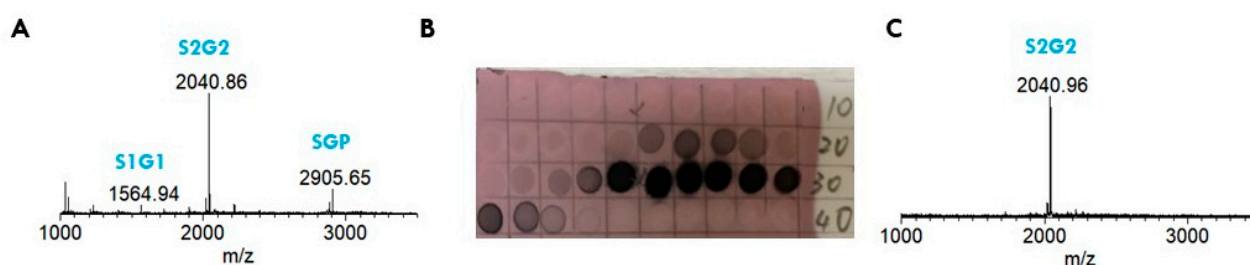

**Supplementary Figure S1.** A) LC-MS analysis of reaction product of SGP digested by EndoS2. B) Carbohydrate staining of AEX separation of di- and mono-sialyl glycans. C) LC-MS analysis of purified disialylglycan

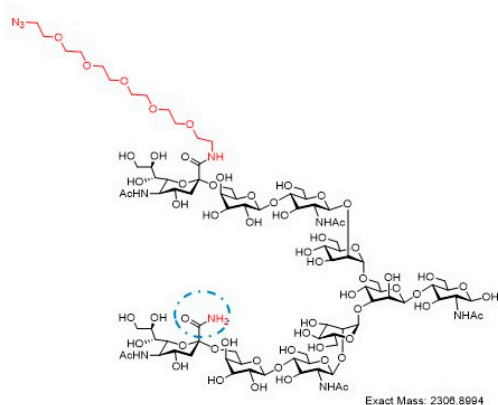

**Supplementary Figure S2.** Molecular structure of mono azido-SCT
